# Supplementary material
Source: PubMed Central journal article supplement (PMC4651178)
Supplement: NIHMS668536-supplement-2.pdf [file NIHMS668536-supplement-2.pdf]

**Table S1. Potential Pdx1-interacting proteins identified by ReCLIP/MS (Ref. Table 1).** Proteins and MS results illustrating percent protein coverage and number of peptides found after IgG or Pdx1 treatment.

| Factor                                         | Hits |      | % Coverage |
|------------------------------------------------|------|------|------------|
|                                                | IgG  | Pdx1 |            |
| Baf47                                          | 0    | 1    | 11         |
| Baf155                                         | 0    | 3    | 3          |
| Baf57                                          | 0    | 2    | 9          |
| Baf170                                         | 0    | 3    | 3          |
| Brg1                                           | 0    | 5    | 1.6        |
| Rbbp4                                          | 1    | 10   | 9          |
| Hdac1                                          | 0    | 5    | 5          |
| Mi2beta                                        | 0    | 7    | 2.5        |
| Tif1beta                                       | 0    | 6    | 14         |
| Spectrin beta chain, brain 1*                  | 1    | 12   | 3.76       |
| Myosin-9*                                      | 1    | 14   | 3.94       |
| Microtubule-associated protein 1B              | 1    | 8    | 1.96       |
| Importin-5                                     | 0    | 8    | 5.27       |
| Chaperonin subunit 2 (Beta), isoform CRA_a*    | 2    | 8    | 6.07       |
| Glyceraldehyde-3-phosphate dehydrogenase*      | 2    | 8    | 16.44      |
| Stip1                                          | 0    | 7    | 8.45       |
| 14-3-3 protein                                 | 1    | 6    | 15.22      |
| ATP citrate lyase                              | 1    | 11   | 10.93      |
| DNA replication licensing factor MCM2          | 2    | 13   | 8.55       |
| DNA replication licensing factor MCM3          | 2    | 10   | 10.41      |
| DNA replication licensing factor MCM7          | 1    | 10   | 8.29       |
| DNA replication licensing factor MCM6          | 2    | 5    | 6.63       |
| DNA replication licensing factor MCM5          | 0    | 7    | 7.39       |
| DNA replication licensing factor MCM4          | 1    | 4    | 4.59       |
| heterogeneous nuclear ribonuclearprotein U*    | 2    | 10   | 2.58       |
| heterogeneous nuclear ribonuclearprotein K*    | 3    | 9    | 19.96      |
| heterogeneous nuclear ribonuclearprotein A1*   | 1    | 3    | 16.06      |
| heterogeneous nuclear ribonuclearprotein C1/C2 | 1    | 3    | 7.23       |
| RuvBL1/2                                       | 0    | 5    | 7.99       |
| Nucleolin*                                     | 1    | 9    | 14.69      |
| alpha actin*                                   | 1    | 7    | 8.84       |
| Elongation factor 2                            | 1    | 4    | 5.64       |
| Elongation factor 1 alpha                      | 1    | 4    | 10.88      |
| Polyadenylate-binding protein *1               | 1    | 2    | 5.47       |
| Serine hydroxymethyltransferase (Shmt2)        | 0    | 3    | 5.67       |
| ATP-dependent RNA helicase Ddx39               | 0    | 2    | 4.4        |
| Actin-like protein 6A                          | 0    | 2    | 7.14       |
| DNA methyltransferase 1                        | 0    | 4    | 0.79       |
| Peroxiredoxin 1                                | 4    | 9    | 24.36      |
| Splicing factor 3B, subunit 3*                 | 1    | 9    | 5.65       |
| Cell division control protein 2 homolog        | 0    | 8    | 6.25       |
| E3 ubiquitin-protein ligase NEDD4-like         | 0    | 7    | 2.83       |
| Smc3                                           | 0    | 5    | 2.02       |
| Serine/threonine-protein phosphatase 2A        | 1    | 4    | 5.91       |
| Triosephosphate isomerase                      | 1    | 5    | 11.56      |
| ATPase WRNIP1                                  | 1    | 3    | 2.51       |

**Table S1. Potential Pdx1-interacting proteins identified by ReCLIP/MS (Ref. Table 1).**  
 Proteins and MS results illustrating percent protein coverage and number of peptides found after IgG or Pdx1 treatment.

|                                                |   |   |       |
|------------------------------------------------|---|---|-------|
| Delta-1-pyrroline-5-carboxylate synthase       | 0 | 6 | 4.98  |
| Structural maintenance of chromosomes 1A       | 0 | 4 | 1.82  |
| Alanyl-tRNA synthetase                         | 0 | 5 | 2.09  |
| Cell division cycle 5-related protein          | 0 | 4 | 4.49  |
| Malate dehydrogenase                           | 0 | 6 | 8.21  |
| Heterogeneous nuclear ribonucleoprotein A3*    | 1 | 6 | 12.51 |
| DNA topoisomerase 2-alpha                      | 1 | 3 | 1.45  |
| Histone deacetylase 6                          | 0 | 3 | 1.53  |
| AP-2 complex subunit beta                      | 1 | 3 | 1.32  |
| Adenosylhomocysteinase                         | 0 | 4 | 5.92  |
| Sister chromatid cohesion protein PDS5 homolog | 0 | 3 | 1.08  |
| U4/U6.U5 tri-snRNP-associated protei           | 0 | 3 | 1.74  |
| Thymopoietin                                   | 0 | 2 | 3.58  |
| Epb4.113 protein                               | 0 | 3 | 2.24  |
| Probable ATP-dependent RNA helicase DDX46      | 0 | 2 | 1.9   |
| C-terminal-binding protein 1                   | 0 | 2 | 2.72  |
| Ubiquitin carboxyl-terminal hydrolase 7        | 0 | 2 | 0.6   |
| Centrosomal protein of 170 kDa                 | 0 | 2 | 0.61  |
| Histone acetyltransferase MYST2                | 0 | 2 | 1.66  |
| NSFL1 cofactor p47                             | 0 | 2 | 3.08  |
| Insulin-like growth factor 2 receptor          | 0 | 1 | 0.27  |
| Serrate RNA effector molecule homolog          | 0 | 2 | 3     |

\* Indicates proteins found within the CRAPome  
 (Mellacheruvu et al., 2013 Nature Methods)
